# Supplementary material
Source: bioRxiv or medRxiv preprint supplement (https://www.biorxiv.org/highwire/filestream/108602/field_highwire_adjunct_files/4/178806-13.pdf)

**Supplementary Figure 13 : Comparison of  $-\log_{10}$  p values obtained from multi-trait and single IDP association tests.** The two figures below compare  $-\log_{10}$  p values for associations identified by one method with the maximum “comparable”  $-\log_{10}$  p values obtained by the other method. **Left hand figure:** each point corresponds to an association between an IDP group and a SNP with multi-trait  $-\log_{10}$  p value  $> 7.5$  as detailed in supplementary table 8. Points are colour coded according to the MAF of the lead SNP for the multi-trait association as indicated in the legend at the top of the figure. Multi-trait  $-\log_{10}$  p values are plotted on the horizontal axis. The vertical axis corresponds to the maximum  $-\log_{10}$  p value obtained for an association between any single IDP in that group and any SNP within a flanking region of  $\pm 250$ Kb of the lead SNP for the multi-trait association. **Right hand figure:** each point represents an association between a single IDP and a SNP with single IDP  $-\log_{10}$  p value  $> 7.5$  as detailed in supplementary table 5. Where the same SNP was the lead SNP for associations with multiple IDPs in the same group, only the strongest of these associations (maximum  $-\log_{10}$  p value) is plotted. Points are colour coded according to the MAF of this SNP. The vertical axis corresponds to the single IDP  $-\log_{10}$  p values. For each point, the horizontal axis corresponds to the maximum  $-\log_{10}$  p value obtained for an association between the group to which the IDP belongs and any SNP within a flanking region of  $\pm 250$ Kb around the lead SNP for the single IDP association.

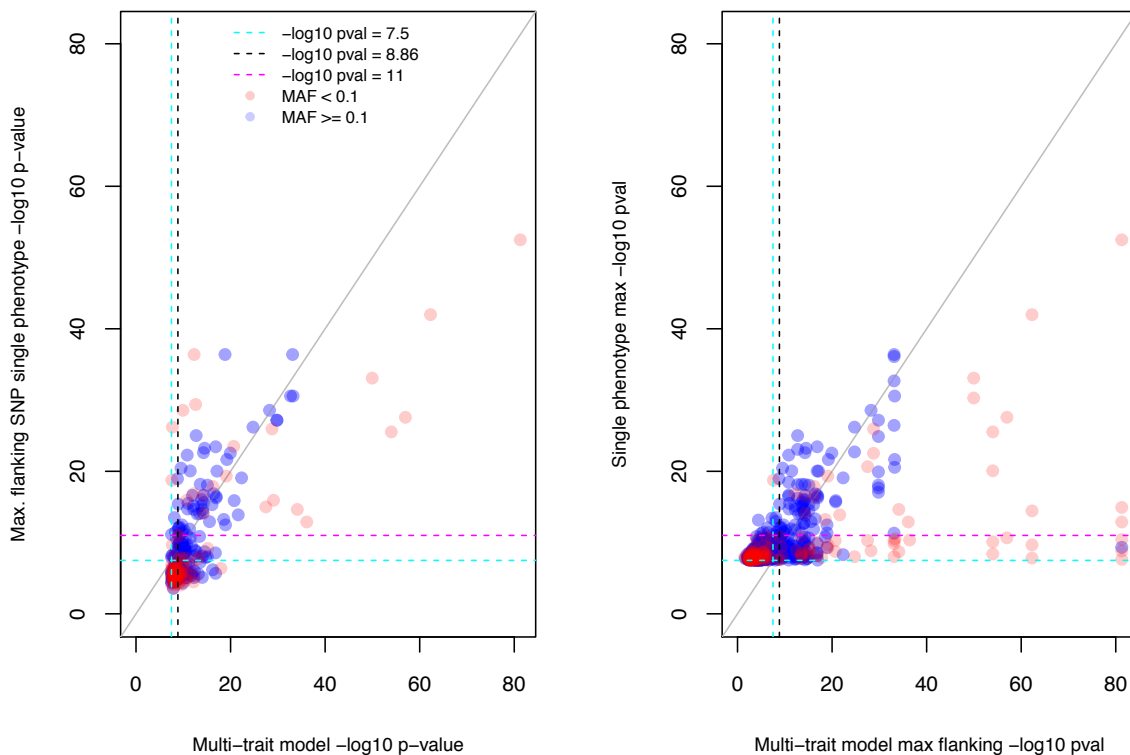

Supplement: Supplementary file [file 178806-13.pdf]
